# Supplementary material for: Cell motility, morphology, viability and proliferation in response to nanotopography on silicon black
Source: Royal Society of Chemistry journal article supplement (doi:10.1039/c2nr11455k), 2012-01-01
Supplement: c2nr11455k.pdf [file c2nr11455k.pdf]

# Supplementary figure for "CELL MOTILITY, MORPHOLOGY, VIABILITY AND PROLIFERATION IN RESPONSE TO NANOTOPOGRAPHY ON SILICON BLACK"

by

Joanna M. Łopacińska<sup>1§</sup>, Cristian Grădinaru<sup>1</sup>, Rafal Wierzbicki<sup>1</sup>, Carsten Købler<sup>1</sup>, Michael S. Schmidt<sup>1</sup>, Martin T. Madsen<sup>1</sup>, Maciej Skolimowski<sup>1</sup>, Martin Dufva<sup>1</sup>, Henrik Flyvbjerg<sup>1</sup>, Kristian Mølhav<sup>1</sup>

<sup>1</sup>Department of Micro- and Nanotechnology, Technical University of Denmark, Ørsted's Plads 345a, 2800 Kongens Lyngby, Denmark

§Corresponding author. E-mail addresses: Joanna.lopacinska@nanotech.dtu.dk

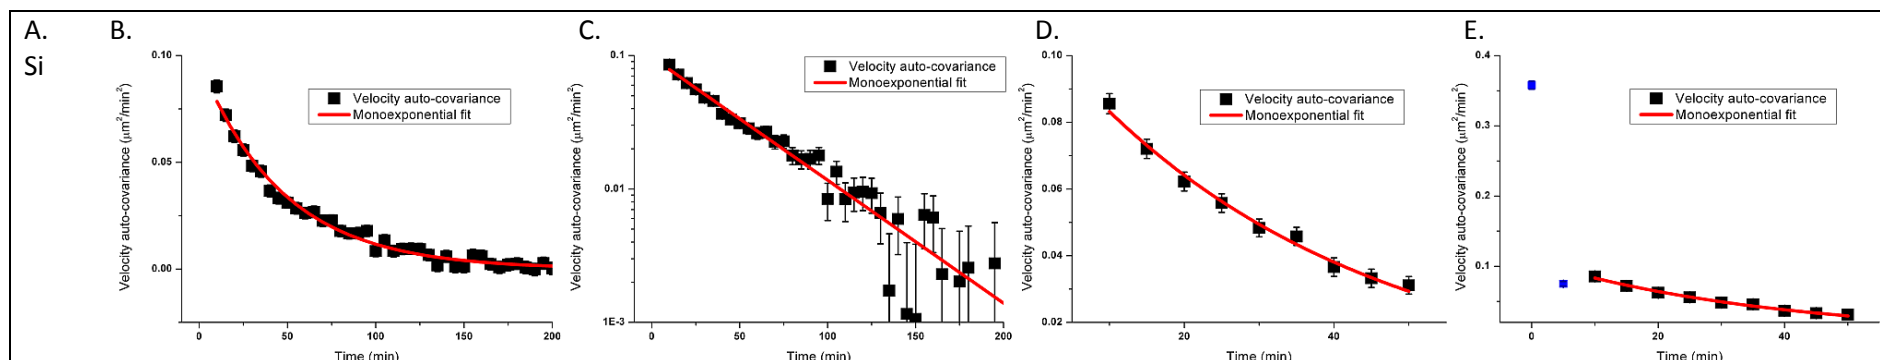

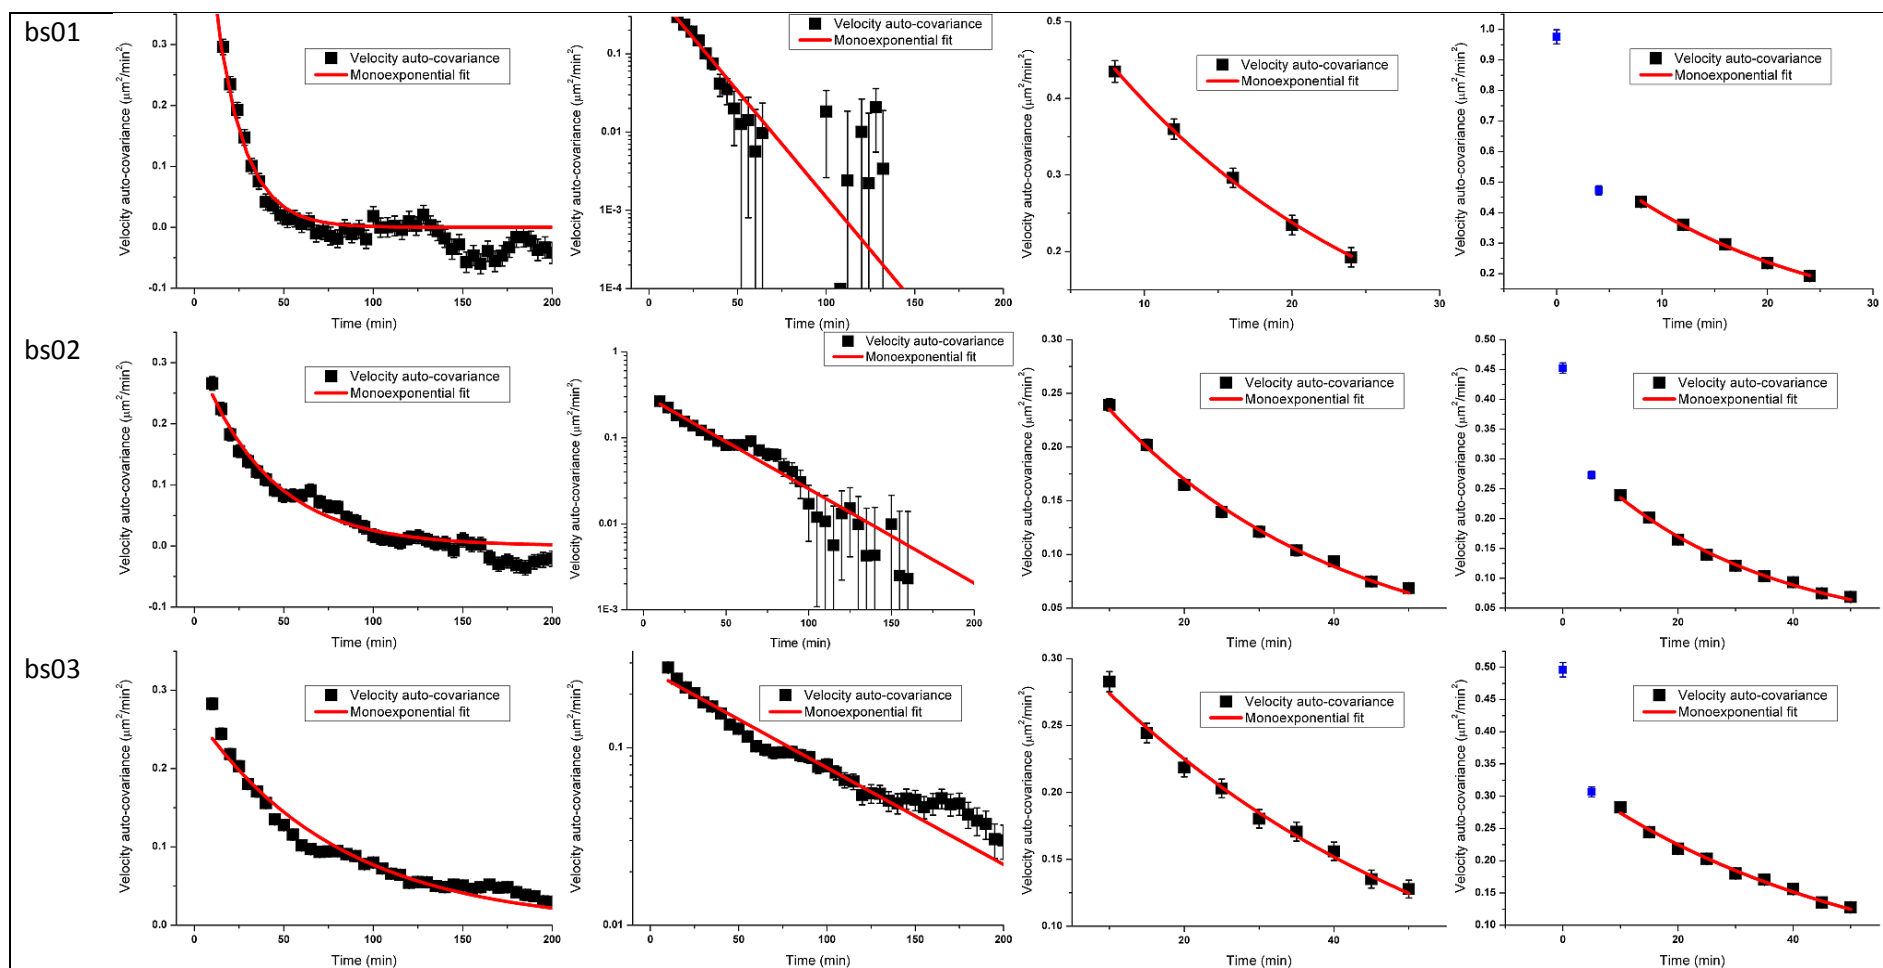

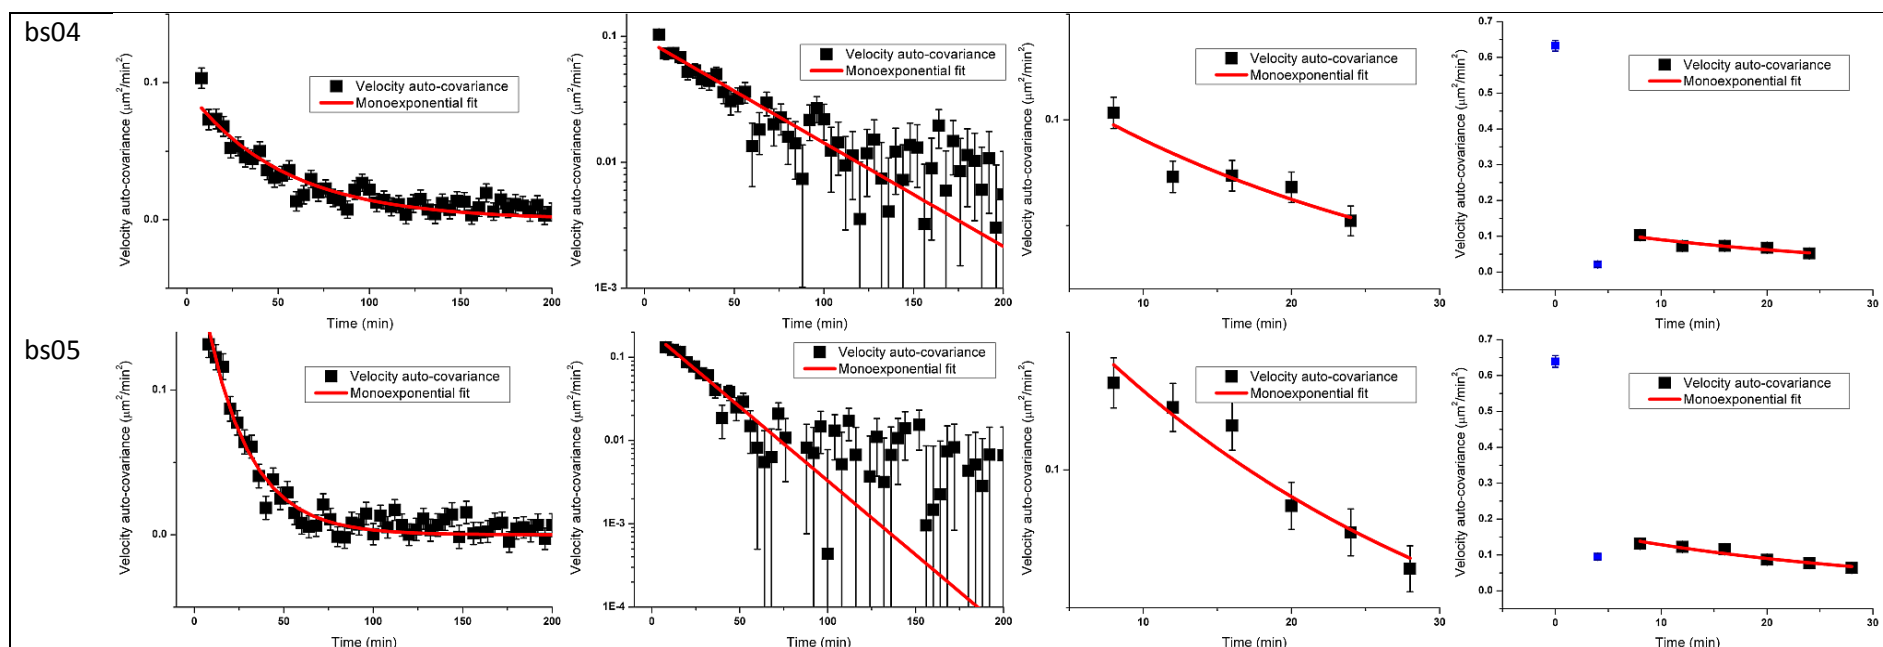

**Figure S1. Auto-covariance of cell velocities.** Experimental results (black squares) were calculated from cell trajectories as in [29].

**Column A.** Surface type.

**Column B.** Lin-lin plot of experimental results fitted out to 750 min time separation.

**Column C.** Log-log plot of experimental results fitted out to 750 min time separation.

**Column D.** Lin-lin plot of experimental results fitted out to 50 min time separation.

**Column E.** Lin-lin plot of experimental results fitted out to 50 min time separation with the first two data points, at 0 and 5 min time separation, shown.
